# Supplementary material for: Dynamical and electronic properties of anion-pillared metal–organic frameworks for natural gas separation
Source: Royal Society of Chemistry journal article supplement (doi:10.1039/d3cp02368k), 2023-01-01
Supplement: d3cp02368k1.pdf [file d3cp02368k1.pdf]

## Appendix A. Supplementary Data

Dynamical and electronic properties of anion-pillared metal-organic frameworks for natural gas separation.

Sabrina Grigoletto, Arthur Gomes dos Santos, Guilherme Ferreira de Lima, Heitor Avelino De Abreu\*

Departamento de Química, Instituto de Ciências Exatas, Universidade Federal de Minas Gerais, Avenida Antônio Carlos, 6627, Pampulha, Belo Horizonte, Minas Gerais, Brazil.

\* Corresponding author: [heitorabreu@ufmg.br](mailto:heitorabreu@ufmg.br) (H. A. De Abreu)

## Summary

|                                                             |    |
|-------------------------------------------------------------|----|
| S1. Models .....                                            | 2  |
| S2. Lennard-Jones parameters for classical simulations..... | 3  |
| S3. Adsorption Energy.....                                  | 4  |
| S4. Adsorption Isotherms Adjust.....                        | 4  |
| S5. Ideal Adsorbed Solution Theory (IAST) selectivity ..... | 5  |
| S6. Molecular Dynamics calculations.....                    | 6  |
| S7. Converged adsorption structures .....                   | 9  |
| S8. Noncovalent interaction analysis .....                  | 10 |
| S9. Inputs.....                                             | 15 |
| S10. References.....                                        | 15 |

## S1. Models

To perform the GCMC and the MD calculations the crystal structures of the MOFs were optimized at PBE+D3/US level theory. The obtained unit cell parameters and bond lengths are available in Table S1 and can be compared with the respective experimental values [1], [2]. In addition to the classical simulations, we performed DFT adsorption calculations. In this case for SIFSIX-3-Cu and for SIFSIX-2-Cu, we used the same unit cells, but for SIFSIX-2-Cu-i we used a reduced primitive cell, to decrease the number of atoms to be described.

Table S1. Unit cell parameters of the MOFs SIFSIX-3-Cu, SIFSIX-2-Cu, SIFSIX-2-Cu-i and the reduced primitive form of SIFSIX-2-Cu-i. The available data is from experimental data and from DFT simulations at PBE+D3/US level theory.

| MOF                     | Methodology   | a (Å)  | b (Å)  | c (Å)  | $\alpha^\circ$ | $\beta^\circ$ | $\gamma^\circ$ |
|-------------------------|---------------|--------|--------|--------|----------------|---------------|----------------|
| SIFSIX-3-Cu             | DFT PBE+D3/US | 6.921  | 6.921  | 7.945  | 90.00          | 90.00         | 90.00          |
|                         | Experimental  | 6.919  | 6.919  | 7.906  | 90.00          | 90.00         | 90.00          |
| SIFSIX-2-Cu             | DFT PBE+D3/US | 13.733 | 13.732 | 8.026  | 90.00          | 90.00         | 90.00          |
|                         | Experimental  | 13.632 | 13.632 | 7.968  | 90.05          | 89.97         | 89.99          |
| SIFSIX-2-Cu-i           | DFT PBE+D3/US | 13.755 | 13.755 | 8.227  | 90.00          | 90.00         | 90.00          |
|                         | Experimental  | 13.649 | 13.649 | 8.092  | 90.00          | 90.00         | 90.06          |
| Primitive SIFSIX-2-Cu-i | DFT PBE+D3/US | 10.234 | 10.263 | 10.773 | 98.46          | 98.35         | 133.63         |

Table S2. Bond lengths of the MOFs SIFSIX-3-Cu, SIFSIX-2-Cu, SIFSIX-2-Cu-i and the reduced primitive form of SIFSIX-2-Cu-i. The available data is from experimental data and from DFT simulations at PBE+D3/US level theory.

| MOF                     | Cu - F (Å) | Si - F <sub>axial</sub> (Å) | Si - F <sub>equatorial</sub> (Å) |
|-------------------------|------------|-----------------------------|----------------------------------|
| SIFSIX-3-Cu             | 2.23       | 1.75                        | 1.70                             |
|                         | 2.12       | 1.83                        | 1.65                             |
| SIFSIX-2-Cu             | 2.28       | 1.73                        | 1.71                             |
|                         | 2.30       | 1.68                        | 1.69                             |
| SIFSIX-2-Cu-i           | 2.38       | 1.74                        | 1.71                             |
|                         | 2.35       | 1.69                        | 1.68                             |
| Primitive SIFSIX-2-Cu-i | 2.30       | 1.74                        | 1.71                             |

## S2. Lennard-Jones parameters for classical simulations

Table S3. Lennard-Jones parameters for MOF atoms

| Atom | $\epsilon/k_b / (\text{K})$ | $\sigma / (\text{Å})$ | Force field           |
|------|-----------------------------|-----------------------|-----------------------|
| Cu   | 2.5161                      | 3.11369               | Universal Force Field |
| Si   | 202.290                     | 3.8264                | Universal Force Field |
| C    | 47.8562                     | 3.47299               | DREIDING              |
| F    | 36.4834                     | 3.0932                | DREIDING              |
| N    | 38.9492                     | 3.26256               | DREIDING              |
| H    | 7.64893                     | 2.84642               | DREIDING              |

Table S4. Lennard-Jones parameters from TraPPE force field for pseudo atoms of adsorbed molecules

| Pseudo Atom                      | $\epsilon/k_b / (\text{K})$ | $\sigma / (\text{\AA})$ | $q$    |
|----------------------------------|-----------------------------|-------------------------|--------|
| CH <sub>4</sub> _sp <sup>3</sup> | 148                         | 3.73                    | 0      |
| CH <sub>3</sub> _sp <sup>3</sup> | 98                          | 3.75                    | 0      |
| CH <sub>2</sub> _sp <sup>3</sup> | 46                          | 3.95                    | 0      |
| CH <sub>2</sub> _sp <sup>2</sup> | 85                          | 3.67                    | 0      |
| CH_sp <sup>2</sup>               | 47                          | 3.73                    | 0      |
| N_N <sub>2</sub>                 | 36.4                        | 3.32                    | -0.482 |
| N_com (center of mass)           | -                           | -                       | 0.964  |

### S3. Adsorption Energy

We performed Monte Carlo simulations in NVT ensemble to compute the variation of internal energy during adsorption process. These values can be compared with the obtained through DFT calculations.

Table S5. Computed adsorption energy

| MOFs          | Molecules      | MC (kcal mol <sup>-1</sup> ) |
|---------------|----------------|------------------------------|
| SIFSIX-3-Cu   | Methane        | -5.9                         |
|               | Ethane         | -8.1                         |
|               | Ethene         | -7.6                         |
|               | Propane        | -7.0                         |
|               | Propene        | -8.6                         |
|               | N <sub>2</sub> | -5.6                         |
| SIFSIX-2-Cu-i | Methane        | -6.7                         |
|               | Ethane         | -8.9                         |
|               | Ethene         | -8.1                         |
|               | Propane        | -9.3                         |
|               | Propene        | -9.9                         |
|               | N <sub>2</sub> | -4.9                         |
| SIFSIX-2-Cu   | Methane        | -2.1                         |
|               | Ethane         | -3.0                         |
|               | Ethene         | -2.7                         |
|               | Propane        | -3.5                         |
|               | Propene        | -3.3                         |
|               | N <sub>2</sub> | -1.6                         |

### S4. Adsorption Isotherms Adjust

Grand canonical Monte Carlo simulations of the adsorption of the molecules were performed in MOFs SIFSIX-3-Cu, SIFSIX-2-Cu-I and SIFSIX-2-Cu. The simulations were performed with 1x10<sup>6</sup> Cycles at 300 K. The isotherms were fitted using the Langmuir-Freudlich model as the following equation:

$$q = \frac{q_{\text{sat}} b P^v}{1 + b P^v}$$

The fitted parameters for each gas at the different MOFs are available in Tables S5, S6 and S7.

Table S5: Fitted adsorption isotherm parameters for gases in SIFSIX-3-Cu

| Molecule       | $q_{\text{sat}} / \text{mmol. g}^{-1}$ | b         | v         |
|----------------|----------------------------------------|-----------|-----------|
| Methane        | 4.33362                                | 0.0083136 | 0.9091390 |
| Ethane         | 3.02744                                | 0.0370561 | 1.0101233 |
| Ethene         | 3.34954                                | 0.0342679 | 0.9185464 |
| Propane        | 2.81094                                | 0.0001425 | 1.4386983 |
| Propene        | 2.70942                                | 0.0197164 | 1.4217901 |
| N <sub>2</sub> | 3.00607                                | 0.0030967 | 0.9853778 |

Table S6: Fitted adsorption isotherm parameters for gases in SIFSIX-2-Cu-i

| Molecule       | $q_{\text{sat}} / \text{mmol. g}^{-1}$ | b         | v         |
|----------------|----------------------------------------|-----------|-----------|
| Methane        | 6.86839                                | 0.0105370 | 1.0381103 |
| Ethane         | 4.72678                                | 0.2239281 | 0.9450387 |
| Ethene         | 5.50046                                | 0.1519167 | 0.7909961 |
| Propane        | 3.67750                                | 0.1194139 | 1.0579861 |
| Propene        | 4.64105                                | 0.5199214 | 0.6744319 |
| N <sub>2</sub> | 6.66438                                | 0.0020685 | 0.9766823 |

Table S7: Fitted adsorption isotherm parameters for gases in SIFSIX-2-Cu

| Molecule       | $q_{\text{sat}} / \text{mmol. g}^{-1}$ | b          | v         |
|----------------|----------------------------------------|------------|-----------|
| Methane        | 25.40713                               | 1.6361e-04 | 1.0298374 |
| Ethane         | 13.27922                               | 1.5014e-04 | 1.6128207 |
| Ethene         | 15.00148                               | 1.1093e-04 | 1.4852562 |
| Propane        | 11.16062                               | 3.6916e-03 | 1.5765728 |
| Propene        | 12.14805                               | 3.1602e-03 | 1.4606678 |
| N <sub>2</sub> | 21.99546                               | 9.3059e-05 | 1.0049125 |

## S5. Ideal Adsorbed Solution Theory (IAST) selectivity

Grand canonical Monte Carlo simulations of binary mixtures of different proportions of CH<sub>4</sub> and other molecules were used to estimate IAST selectivity. Selectivity was calculated with the following equation:

$$S = \frac{\frac{q_i}{x_i}}{\frac{q_j}{x_j}}$$

where  $q_i$  and  $q_j$  are the amount adsorbed and  $x_i$  and  $x_j$  are the molar fractions of each component of the binary mixture. The calculations were performed with  $5.0 \times 10^4$  cycles of initialization and  $1.0 \times 10^6$  cycles of simulation at  $1.0 \times 10^5$  Pa and 300 K. We used binary mixtures of 0.25, 0.5, 0.75 and 0.99 molar fractions of methane with each one of the studied molecules. Calculated IAST selectivity's are presented in Figure S1.

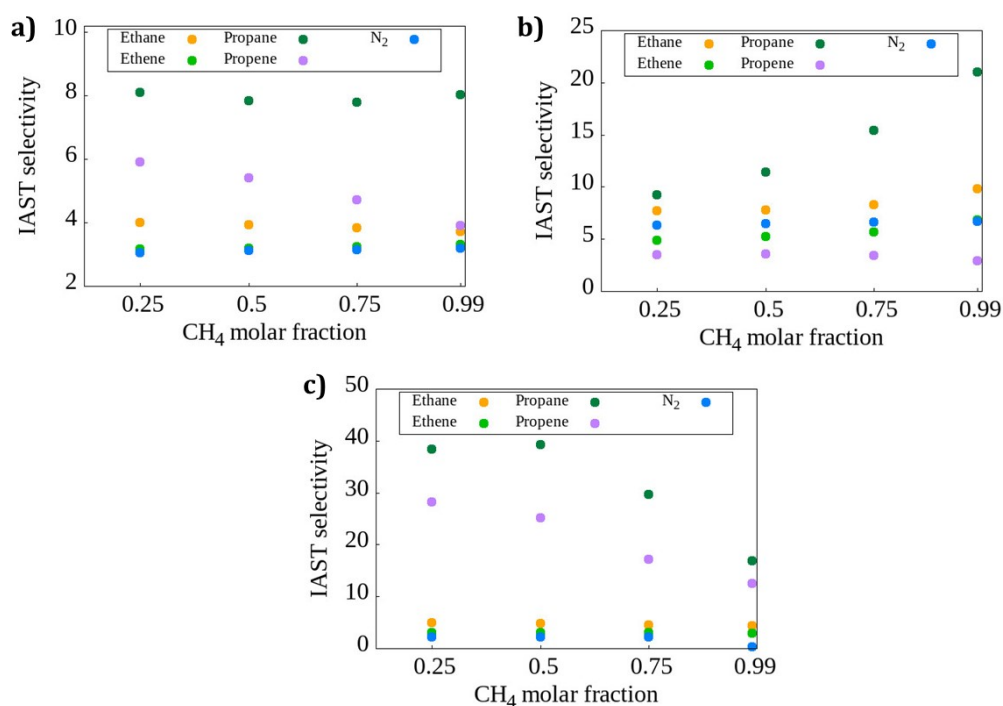

Figure S1: Calculated IAST selectivity's for binary mixtures of CH<sub>4</sub>/C<sub>2</sub>H<sub>6</sub>, CH<sub>4</sub>/C<sub>2</sub>H<sub>4</sub>, CH<sub>4</sub>/C<sub>3</sub>H<sub>8</sub>, CH<sub>4</sub>/C<sub>3</sub>H<sub>6</sub> and CH<sub>4</sub>/N<sub>2</sub> of variable molar fractions of the components in MOFs a) SIFSIX-3-Cu, b) SIFSIX-2-Cu-i and c) SIFSIX-2-Cu.

## S6. Molecular Dynamics calculations

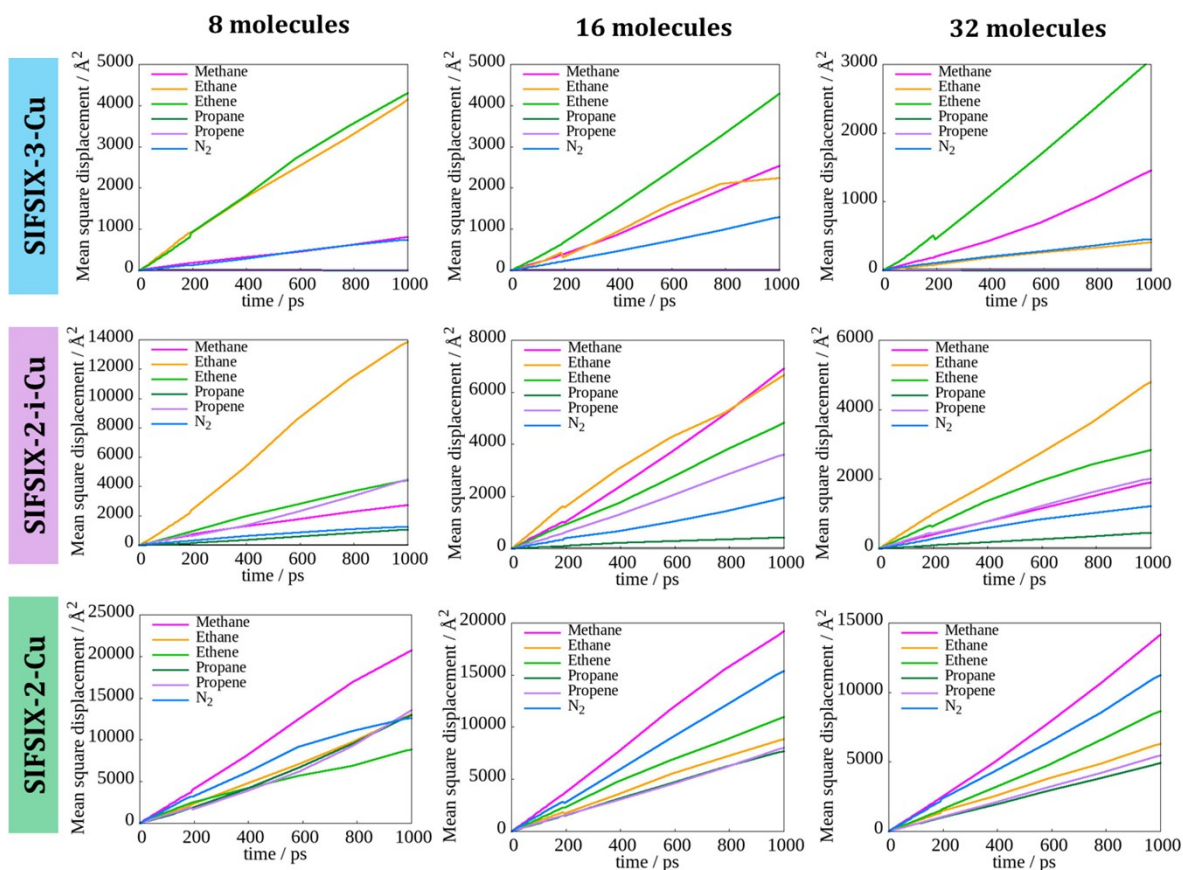

Figure S2: Plots of the mean square displacement in function of time for 8, 16 and 32 molecules of the guest molecules methane (pink), ethane (orange), ethene (light green), propane (dark green), propene (purple) and  $\text{N}_2$  (light blue) in SIFSIX-3-Cu, SIFSIX-2-Cu-i and SIFSIX-2-Cu.

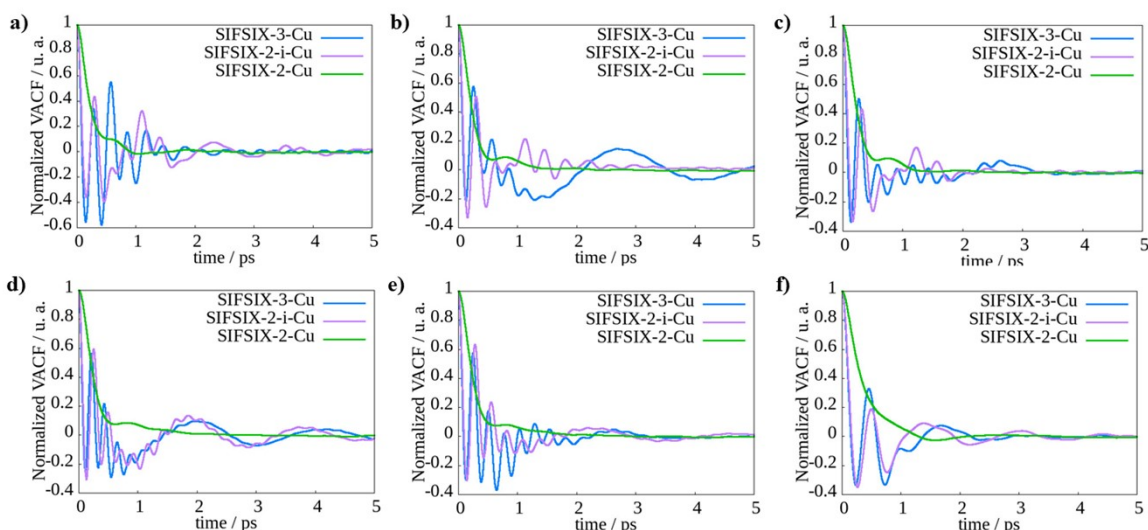

Figure S3: Plots of the normalized velocity autocorrelation function in function of time for 8 molecules of a) methane, b) ethane, c) ethene, d) propane, e) propene and f)  $N_2$  in SIFSIX-3-Cu, SIFSIX-2-Cu-i and SIFSIX-2-Cu.

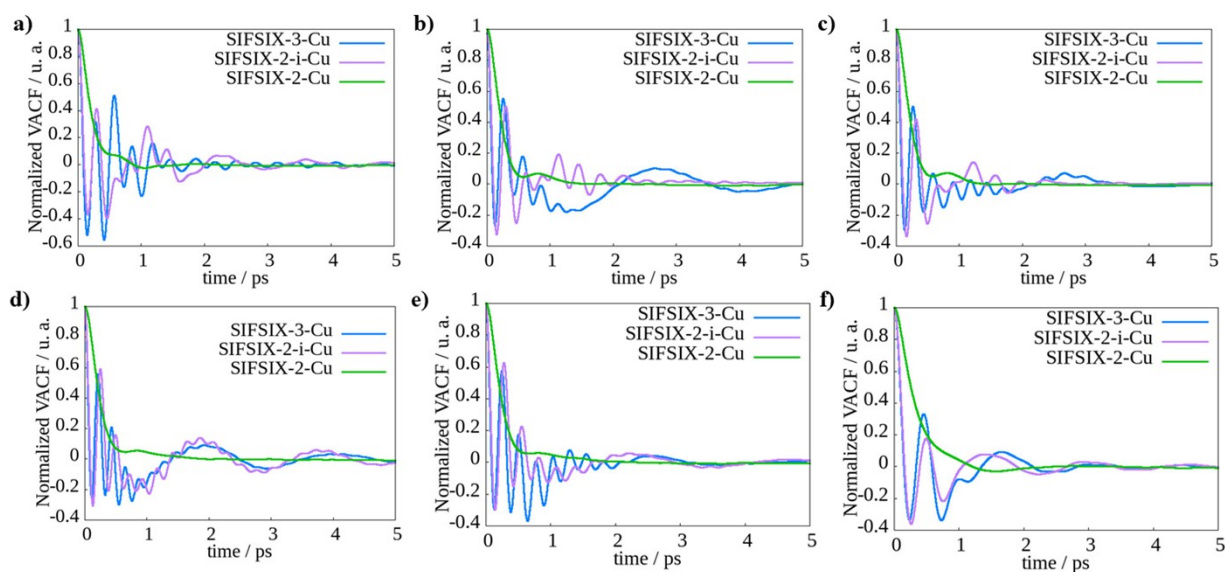

Figure S4: Plots of the normalized velocity autocorrelation function in function of time for 16 molecules of a) methane, b) ethane, c) ethene, d) propane, e) propene and f)  $N_2$  in SIFSIX-3-Cu, SIFSIX-2-Cu-I and SIFSIX-2-Cu.

In addition to calculating the self-diffusion coefficients through linear regression of the mean square displacement and the Einstein equation, as presented in the manuscript, we have also determined them by integrating the Velocity Autocorrelation Function (VACF) curves. The corresponding results are provided in Table S8. The integration of the VACF curves is computed in RASPA software using a generalization of the Simpson's rule in which it is exact for cubic polynomials and is valid for an odd as well as even number of intervals[3].



Table S8. Self diffusion coefficients for 8, 16 and 32 molecules of methane, ethane, ethene, propane, propene and N<sub>2</sub> at SIFSIX-3-Cu, SIFSIX-2-Cu-i and SIFSIX-2-Cu.

| MOFs          | N° of molecules | Diffusion x 10 <sup>-9</sup> / m <sup>2</sup> s <sup>-1</sup> |        |        |         |         |                |
|---------------|-----------------|---------------------------------------------------------------|--------|--------|---------|---------|----------------|
|               |                 | Methane                                                       | Ethane | Ethene | Propane | Propene | N <sub>2</sub> |
| SIFSIX-3-CU   | 8               | 2.26                                                          | 7.29   | 6.27   | -       | -       | 1.03           |
|               | 16              | 3.83                                                          | 2.46   | 5.14   | -       | -       | 1.85           |
|               | 32              | 2.56                                                          | 0.83   | 3.76   | -       | -       | 1.23           |
| SIFSIX-2-CU-i | 8               | 6.40                                                          | 17.7   | 7.75   | 1.27    | 6.28    | 3.25           |
|               | 16              | 9.50                                                          | 14.4   | 7.98   | 1.04    | 5.13    | 3.17           |
|               | 32              | 3.94                                                          | 9.14   | 5.94   | 0.89    | 4.12    | 2.34           |
| SIFSIX-2-Cu   | 8               | 33.5                                                          | 20.5   | 25.4   | 15.1    | 17.1    | 30.1           |
|               | 16              | 29.9                                                          | 19.0   | 19.4   | 13.2    | 14.6    | 26.1           |
|               | 32              | 21.2                                                          | 13.2   | 14.2   | 9.33    | 4.67    | 19.6           |

### S7. Converged adsorption structures

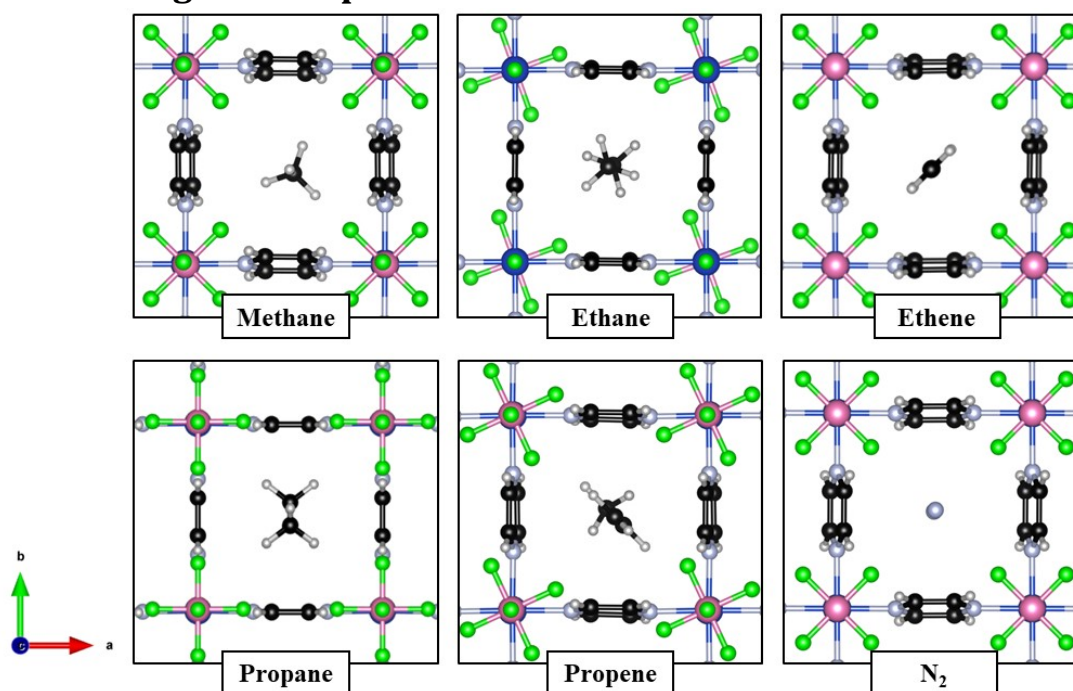

Figure S5: Converged structures for the adsorption of gas molecules in SIFSIX-3-Cu.

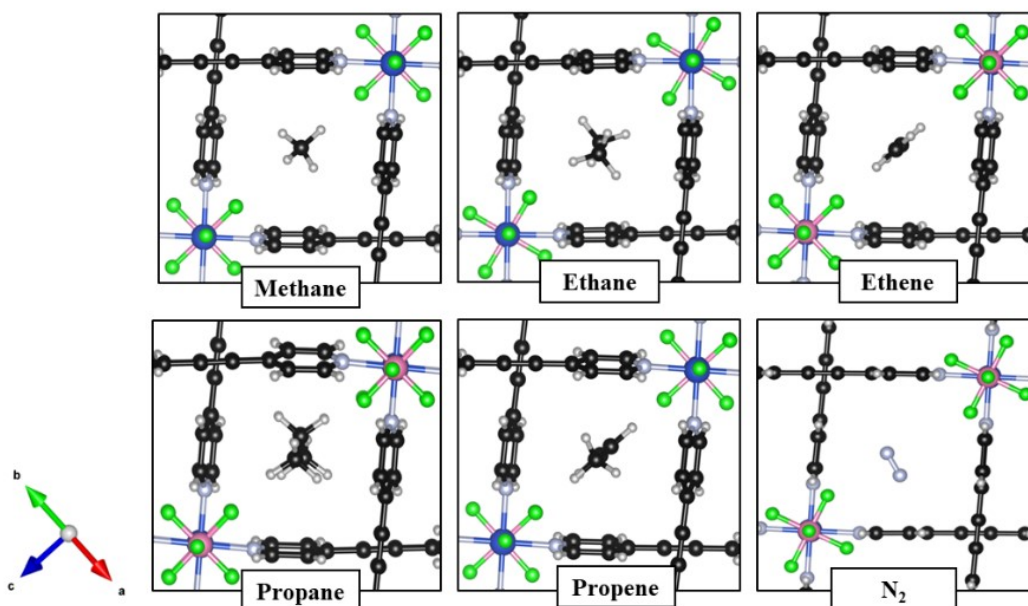

Figure S6: Converged structures for the adsorption of gas molecules in SIFSIX-2-Cu-i

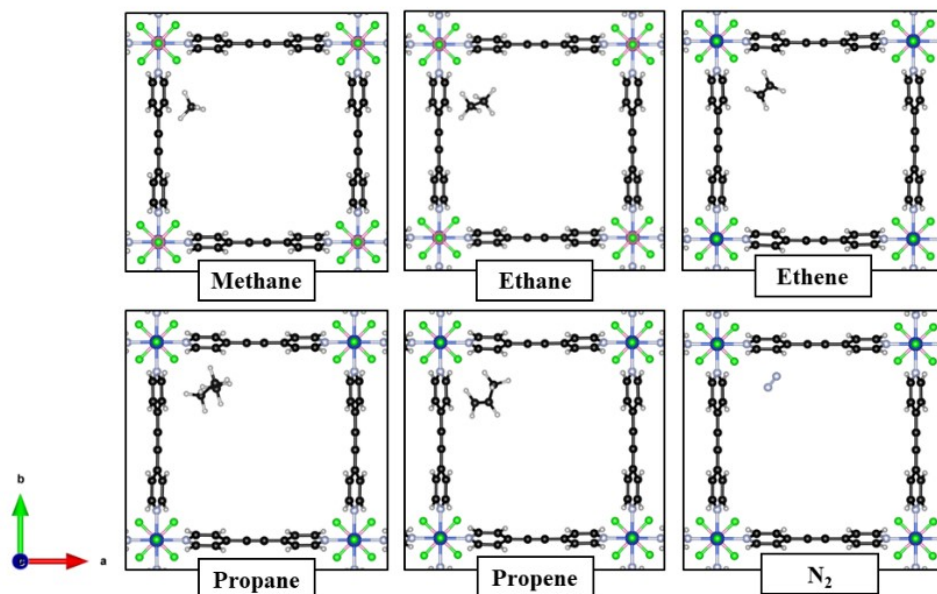

Figure S7: Converged structures for the adsorption of gas molecules in SIFSIX-2-Cu.

## S8. Noncovalent interaction analysis

The noncovalent interaction (NCI) analysis calculations were performed in CRITIC2 software using the converged electronic density from DFT calculations. The visualization of NCI analysis was done in Visual Molecular Dynamics (VMD) software. Intramolecular interactions were not accounted.

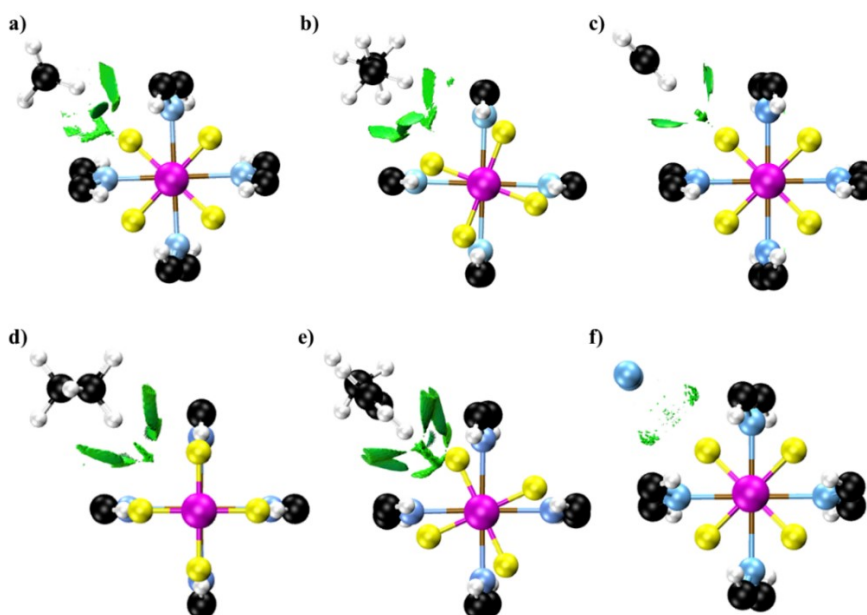

Figure S8: NCI plots of the adsorption of a) methane, b) ethane, c) ethene, d) propane, e) propene and f)  $N_2$  in SIFSIX-3-Cu. The value of  $s$  for the isosurface level illustrated is 0.5 a.u. and the colour scale is  $0.03 < \rho < 0.03$  a.u. Legend of atoms: carbon (black), hydrogen (white), nitrogen (light blue), copper (brown) and silicon (pink).

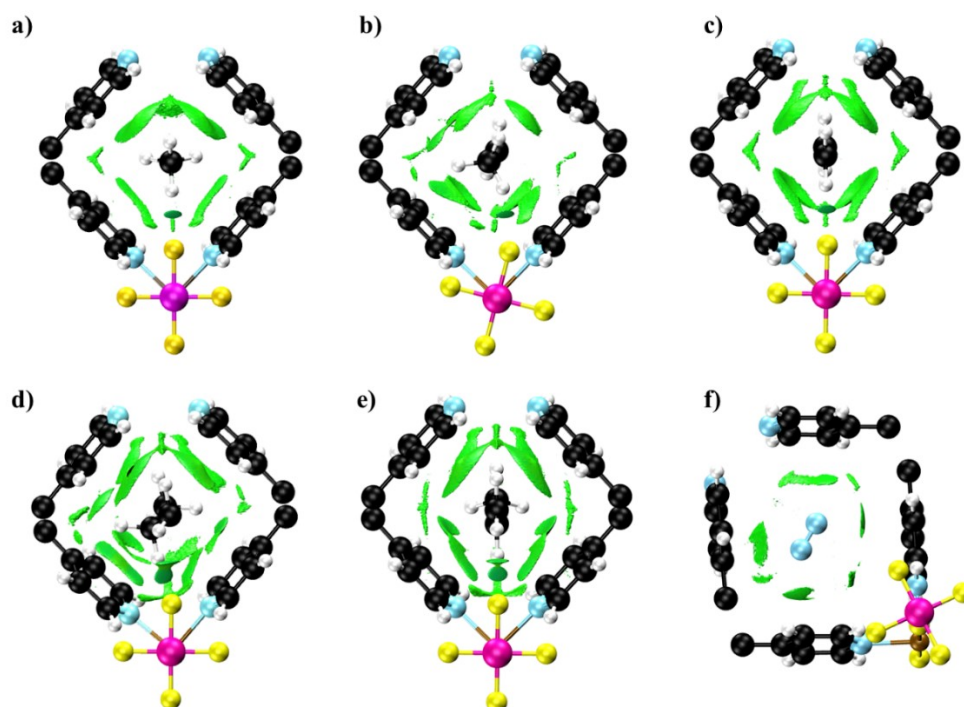

Figure S9: NCI plots of the adsorption of a) methane, b) ethane, c) ethene, d) propane, e) propene and f)  $N_2$  in SIFSIX-2-Cu-i. The value of  $s$  for the isosurface level illustrated is 0.5 a.u. and the colour scale is  $0.03 < \rho < 0.03$  a.u. Legend of atoms: carbon (black), hydrogen (white), nitrogen (light blue), copper (brown) and silicon (pink).

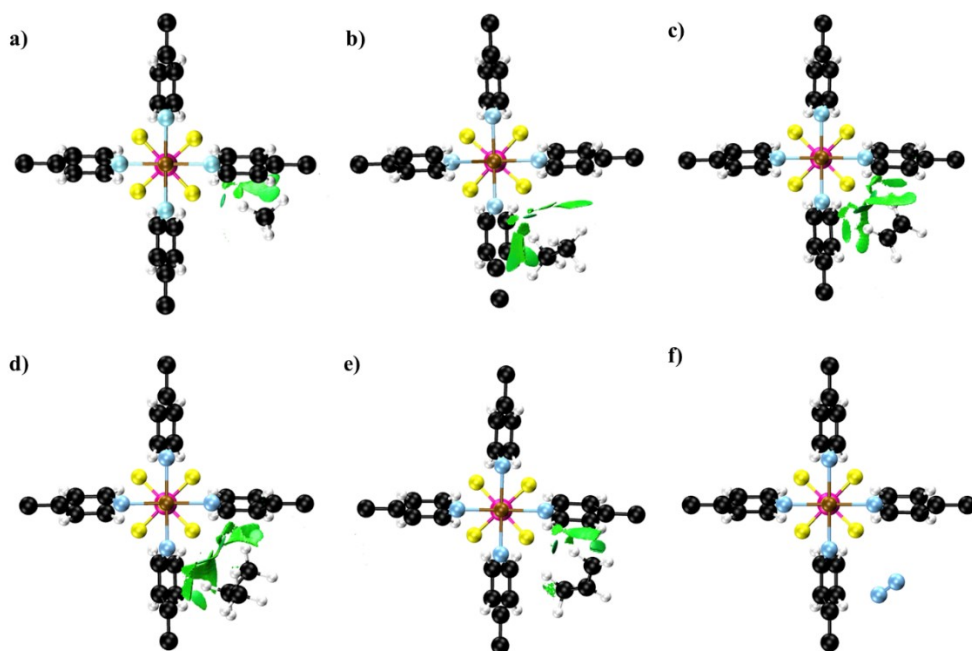

Figure S10: NCI plots of the adsorption of a) methane, b) ethane, c) ethene, d) propane, e) propene and f)  $N_2$  in SIFSIX-2-Cu. The value of  $s$  for the isosurface level illustrated is 0.5 a.u. and the colour scale is  $0.03 < \rho < 0.03$  a.u. Legend of atoms: carbon (black), hydrogen (white), nitrogen (light blue), copper (brown) and silicon (pink).

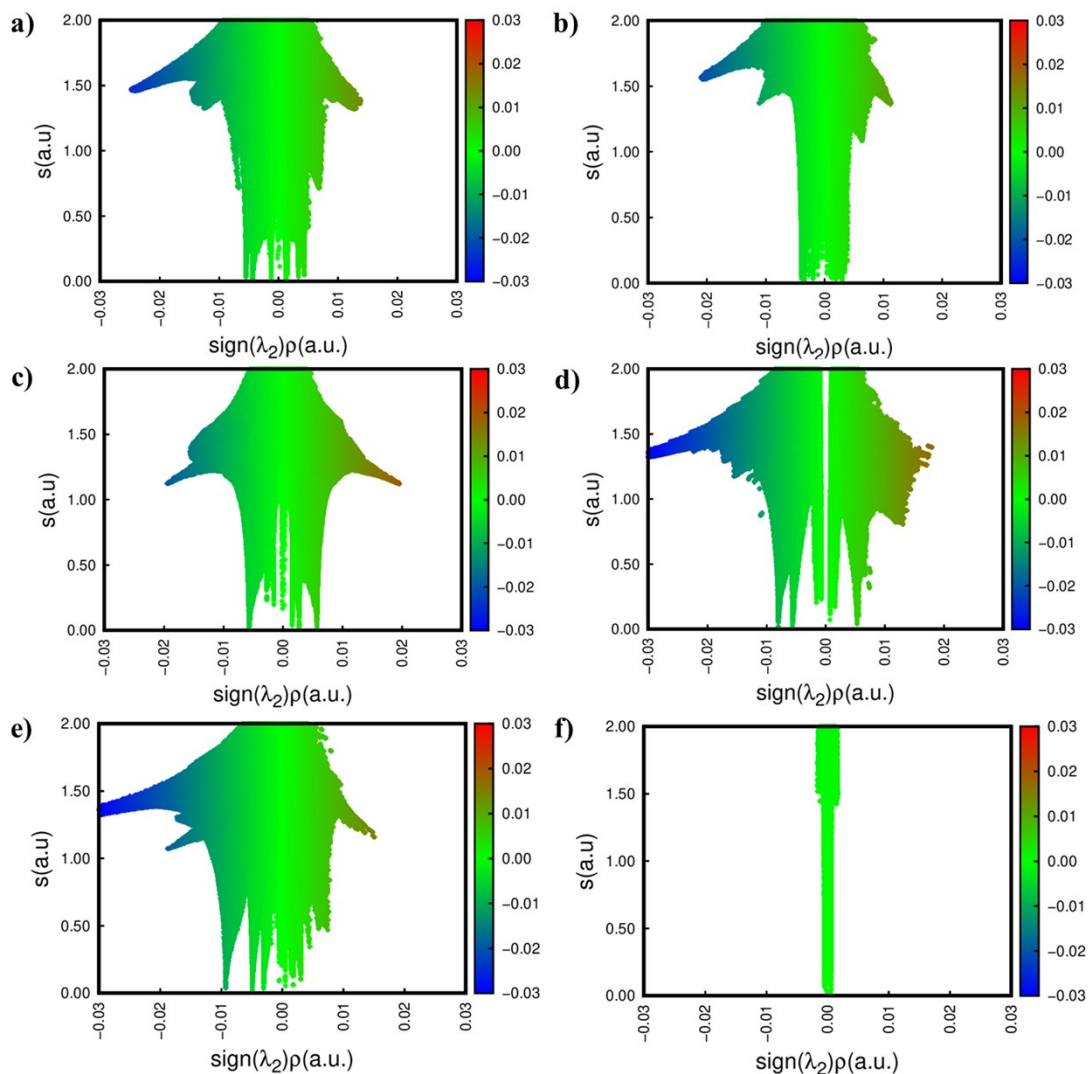

Figure S11: NCI colour maps for the adsorption a) methane, b) ethane, c) ethene, d) propane, e) propene and f)  $N_2$  at SIFSIX-3-Cu MOF. The values of  $s$  and  $\text{sign}(\lambda_2)\rho$  which characterize ionic interactions, van der Waals interactions and steric clashes are in blue, green and red, respectively.

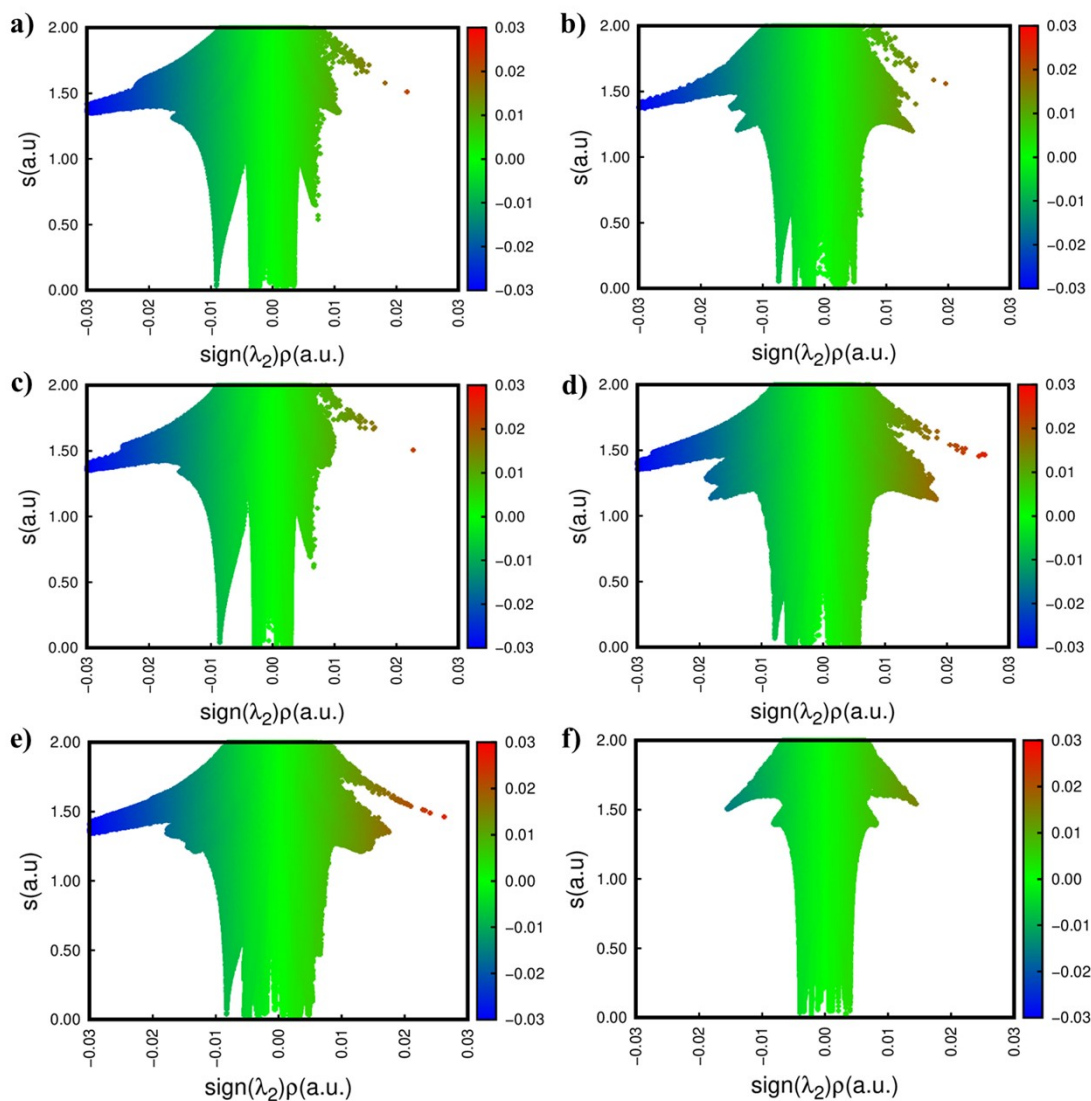

Figure S12: NCI colour maps for the adsorption a) methane, b) ethane, c) ethene, d) propane, e) propene and f)  $N_2$  at SIFSIX-2-Cu-i MOF. The values of  $s$  and  $\text{sign}(\lambda_2)\rho$  which characterize ionic interactions, van der Waals interactions and steric clashes are in blue, green and red, respectively.

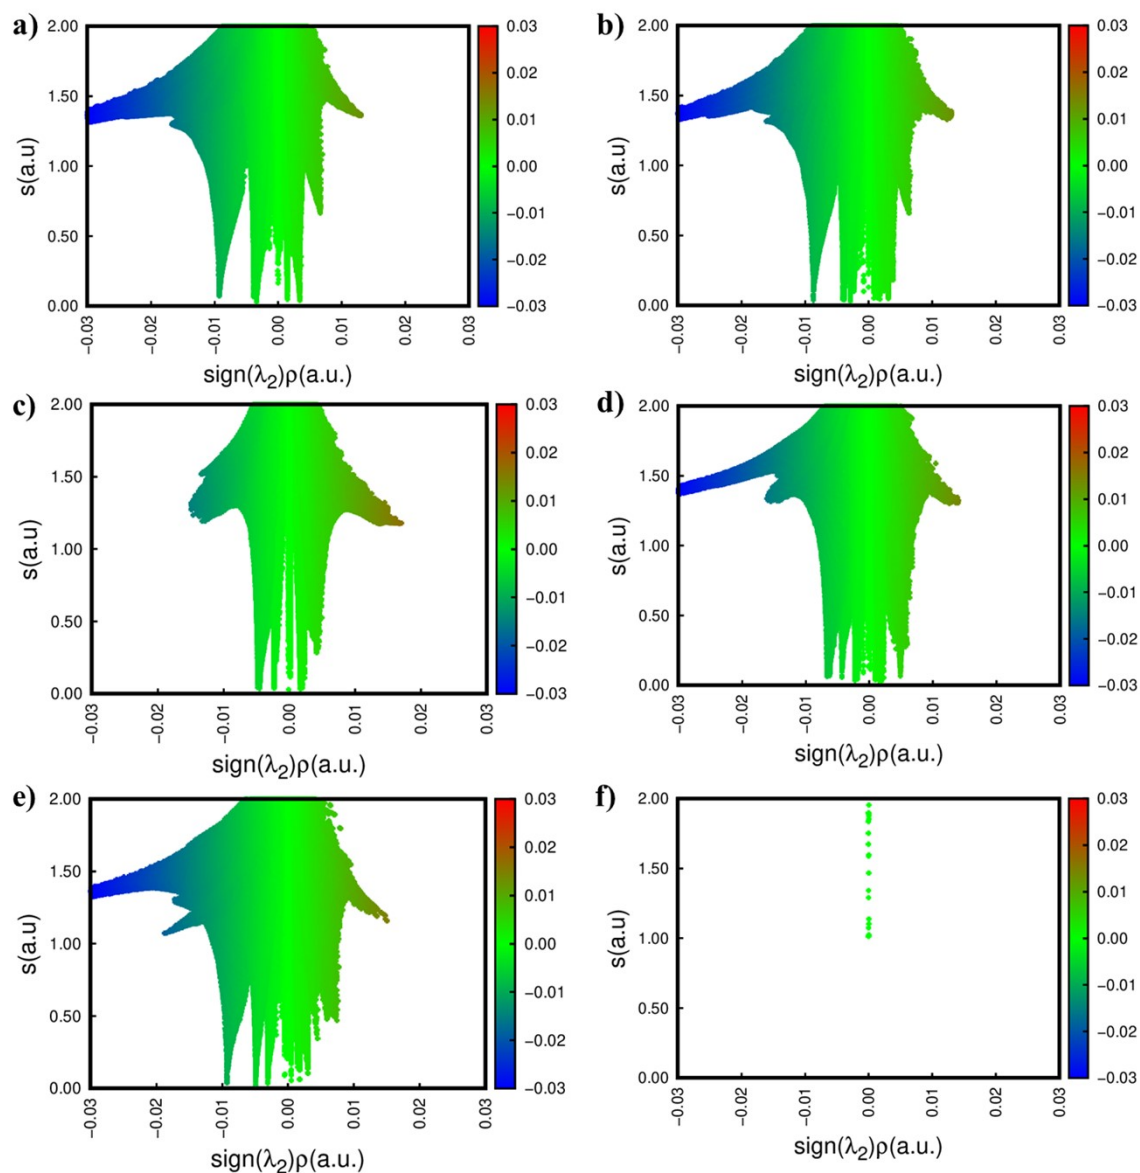

Figure S13: NCI colour maps for the adsorption a) methane, b) ethane, c) ethene, d) propane, e) propene and f)  $N_2$  at SIFSIX-2-Cu MOF. The values of  $s$  and  $\text{sign}(\lambda_2)\rho$  which characterize ionic interactions, van der Waals interactions and steric clashes are in blue, green and red, respectively.

## S9. Inputs

In this section, are presented the input files used for some of the performed calculations.

1. SIFSIX-3-Cu optimization input for Quantum ESPRESSO software.

```
&CONTROL
  calculation = 'vc-relax'
  title = 'SIFSIX-3-Cu'
  pseudo_dir = ''
  tprnfor = .TRUE.
  tstress = .TRUE.
  verbosity = 'high'
  nstep = 600
  etot_conv_thr = 1.0D-5
  forc_conv_thr = 1.0D-5
/
&system
 ibrav      = 6
a           = 6.91860
b           = 6.91860
c           = 7.90610
nat        = 28
ntyp       = 6
ecutwfc    = 60.0D0
ecutrho    = 480.0D0
nspin      = 1
vdw_corr   = 'Grimme-D3'
occupations = 'smearing'
degauss    = 0.02D0
smearing   = 'gaussian'
/
&electrons
conv_thr    = 1.0D-9
mixing_mode = 'local-TF'
mixing_beta = 0.5D0
diagonalization = 'david'
startingwfc = 'atomic+random'
electron_maxstep = 600
/
&ions
ion_dynamics = 'bfgs'
ion_positions = 'default'
pot_extrapolation = 'atomic'
wfc_extrapolation = 'none'
/
&cell
cell_dynamics = 'bfgs'
cell_dofree   = 'all'
/
```



```

ATOMIC_SPECIES
F      18.998  f_pbe_v1.4.uspp.F.UPF
C      12.011  c_pbe_v1.2.uspp.F.UPF
H       1.008  h_pbe_v1.4.uspp.F.UPF
N      14.007  n_pbe_v1.2.uspp.F.UPF
Si     28.085  si_pbe_v1.uspp.F.UPF
Cu     63.546  cu_pbe_v1.2.uspp.F.UPF
ATOMIC_POSITIONS {crystal}
N      0.500000000000      0.217000000000      0.500000000000
C      0.500000000000      0.089300000000      0.384300000000
H      0.500000000000      0.140100000000      0.279800000000
Cu     0.500000000000      0.500000000000      0.500000000000
F      0.500000000000      0.500000000000      0.232000000000
F      0.331300000000      0.331300000000      0.000000000000
Si     0.500000000000      0.500000000000      0.000000000000
N      0.783000000000      0.500000000000      0.500000000000
C      0.910700000000      0.500000000000      0.384300000000
H      0.859900000000      0.500000000000      0.279800000000
F      0.668700000000      0.331300000000      0.000000000000
N      0.500000000000      0.783000000000      0.500000000000
C      0.500000000000      0.910700000000      0.384300000000
H      0.500000000000      0.859900000000      0.279800000000
F      0.668700000000      0.668700000000      0.000000000000
N      0.217000000000      0.500000000000      0.500000000000
C      0.089300000000      0.500000000000      0.384300000000
H      0.140100000000      0.500000000000      0.279800000000
F      0.331300000000      0.668700000000      0.000000000000
C      0.500000000000      0.910700000000      0.615700000000
H      0.500000000000      0.859900000000      0.720200000000
F      0.500000000000      0.500000000000      0.768000000000
C      0.089300000000      0.500000000000      0.615700000000
H      0.140100000000      0.500000000000      0.720200000000
C      0.500000000000      0.089300000000      0.615700000000
H      0.500000000000      0.140100000000      0.720200000000
C      0.910700000000      0.500000000000      0.615700000000
H      0.859900000000      0.500000000000      0.720200000000
K_POINTS automatic
4 4 4 1 1 1

```

## 2. SIFSIX-2-Cu optimization input for Quantum ESPRESSO software

```

&CONTROL
  calculation = 'vc-relax'
  title = 'SIFSIX-2'
  pseudo_dir = ''
  restart_mode = 'from_scratch'
  tprnfor = .TRUE.
  tstress = .TRUE.
  verbosity = 'high'
  nstep = 600

```

```

    etot_conv_thr = 1.0D-5
    forc_conv_thr = 1.0D-5
/
&system
 ibrav          = 6
a              = 13.631600
b              = 13.63160
c              = 7.96800
nat           = 52
ntyp          = 6
ecutwfc       = 50.0D0
ecutrho       = 400.0D0
nspin         = 1
vdw_corr      = 'Grimme-D3'
occupations   = 'smearing'
degauss       = 0.02D0
smearing      = 'gaussian'
/
&electrons
conv_thr       = 1.0D-9
mixing_mode    = 'local-TF'
mixing_beta    = 0.5D0
diagonalization = 'david'
startingwfc    = 'atomic+random'
electron_maxstep = 600
/
&ions
ion_dynamics   = 'bfgs'
ion_positions  = 'default'
pot_extrapolation = 'atomic'
wfc_extrapolation = 'none'
/
&cell
cell_dynamics = 'bfgs'
cell_dofree   = 'all'
/
ATOMIC_SPECIES
F  18.998  f_pbe_v1.4.uspp.F.UPF
C  12.011  c_pbe_v1.2.uspp.F.UPF
H   1.008  h_pbe_v1.4.uspp.F.UPF
N  14.007  n_pbe_v1.2.uspp.F.UPF
Si 28.085  si_pbe_v1.uspp.F.UPF
Cu 63.546  cu_pbe_v1.2.uspp.F.UPF
ATOMIC_POSITIONS {crystal}
Cu  0.500000000000  0.500000000000  0.000000000000
Si  0.500000000000  0.500000000000  0.500000000000
F   0.500000000000  0.500000000000  0.711300000000
C   0.500000000000  0.148600000000  0.000000000000
N   0.500000000000  0.351300000000  0.000000000000
F   0.396500000000  0.432300000000  0.500000000000

```

|   |                |                |                |
|---|----------------|----------------|----------------|
| C | 0.500000000000 | 0.044200000000 | 0.000000000000 |
| C | 0.851400000000 | 0.500000000000 | 0.000000000000 |
| N | 0.648700000000 | 0.500000000000 | 0.000000000000 |
| F | 0.567700000000 | 0.396500000000 | 0.500000000000 |
| C | 0.955800000000 | 0.500000000000 | 0.000000000000 |
| C | 0.698300000000 | 0.457500000000 | 0.876900000000 |
| H | 0.662800000000 | 0.427100000000 | 0.788400000000 |
| C | 0.798700000000 | 0.455800000000 | 0.872400000000 |
| H | 0.831900000000 | 0.424400000000 | 0.782400000000 |
| C | 0.500000000000 | 0.851400000000 | 0.000000000000 |
| N | 0.500000000000 | 0.648700000000 | 0.000000000000 |
| F | 0.603500000000 | 0.567700000000 | 0.500000000000 |
| C | 0.500000000000 | 0.955800000000 | 0.000000000000 |
| C | 0.542500000000 | 0.698300000000 | 0.876900000000 |
| H | 0.572900000000 | 0.662800000000 | 0.788400000000 |
| C | 0.544200000000 | 0.798700000000 | 0.872400000000 |
| H | 0.575600000000 | 0.831900000000 | 0.782400000000 |
| C | 0.148600000000 | 0.500000000000 | 0.000000000000 |
| N | 0.351300000000 | 0.500000000000 | 0.000000000000 |
| F | 0.432300000000 | 0.603500000000 | 0.500000000000 |
| C | 0.044200000000 | 0.500000000000 | 0.000000000000 |
| C | 0.301700000000 | 0.542500000000 | 0.876900000000 |
| H | 0.337200000000 | 0.572900000000 | 0.788400000000 |
| C | 0.201300000000 | 0.544200000000 | 0.872400000000 |
| H | 0.168100000000 | 0.575600000000 | 0.782400000000 |
| F | 0.500000000000 | 0.500000000000 | 0.288700000000 |
| C | 0.457500000000 | 0.698300000000 | 0.123100000000 |
| H | 0.427100000000 | 0.662800000000 | 0.211600000000 |
| C | 0.455800000000 | 0.798700000000 | 0.127600000000 |
| H | 0.424400000000 | 0.831900000000 | 0.217600000000 |
| C | 0.301700000000 | 0.457500000000 | 0.123100000000 |
| H | 0.337200000000 | 0.427100000000 | 0.211600000000 |
| C | 0.201300000000 | 0.455800000000 | 0.127600000000 |
| H | 0.168100000000 | 0.424400000000 | 0.217600000000 |
| C | 0.698300000000 | 0.542500000000 | 0.123100000000 |
| H | 0.662800000000 | 0.572900000000 | 0.211600000000 |
| C | 0.798700000000 | 0.544200000000 | 0.127600000000 |
| H | 0.831900000000 | 0.575600000000 | 0.217600000000 |
| C | 0.457500000000 | 0.301700000000 | 0.123100000000 |
| H | 0.427100000000 | 0.337200000000 | 0.211600000000 |
| C | 0.455800000000 | 0.201300000000 | 0.127600000000 |
| H | 0.424400000000 | 0.168100000000 | 0.217600000000 |
| C | 0.542500000000 | 0.301700000000 | 0.876900000000 |
| H | 0.572900000000 | 0.337200000000 | 0.788400000000 |
| C | 0.544200000000 | 0.201300000000 | 0.872400000000 |
| H | 0.575600000000 | 0.168100000000 | 0.782400000000 |

K\_POINTS automatic

2 2 4 1 1 1

### 3. SIFSIX-2-Cu-i unit cell optimization input in Quantum ESPRESSO

```
&CONTROL
  calculation = 'vc-relax'
  title = 'sifsix-2-i'
  pseudo_dir = ''
  restart_mode = 'from_scratch'
  tprnfor = .TRUE.
  tstress = .TRUE.
  verbosity = 'high'
  nstep = 600
  etot_conv_thr = 1.0D-5
  forc_conv_thr = 1.0D-5
/
&system
 ibrav      = 0
  nat       = 104
  ntyp      = 6
  ecutwfc   = 50.0D0
  ecutrho   = 400.0D0
  nspin     = 1
  vdw_corr  = 'Grimme-D3'
  occupations = 'smearing'
  degauss   = 0.02D0
  smearing  = 'gaussian'
/
&electrons
  conv_thr      = 1.0D-9
  mixing_mode   = 'local-TF'
  mixing_beta   = 0.5D0
  diagonalization = 'david'
  startingwfc   = 'atomic+random'
  electron_maxstep = 600
/
&ions
  ion_dynamics      = 'bfgs'
  ion_positions     = 'default'
  pot_extrapolation = 'atomic'
  wfc_extrapolation = 'none'
/
&cell
  cell_dynamics = 'bfgs'
  cell_dofree   = 'all'
/
ATOMIC_SPECIES
Cu 63.55 cu_pbe_v1.2.uspp.F.UPF
Si 28.09 si_pbe_v1.uspp.F.UPF
F  19.00 f_pbe_v1.4.uspp.F.UPF
C  12.01 c_pbe_v1.2.uspp.F.UPF
N  14.00 n_pbe_v1.2.uspp.F.UPF
```

```

H      1.01  h_pbe_v1.4.uspp.F.UPF
CELL_PARAMETERS {angstrom}
 13.64900      0.00000      0.00000
  0.00000     13.64900      0.00000
  0.00000      0.00000     8.09200
ATOMIC_POSITIONS {crystal}
C      -0.000000   0.300100   0.354300
C      -0.000000   0.197800   0.362400
C       0.000000   0.456900   0.500000
C      -0.000000   0.351900   0.500000
C       0.699900  -0.000000   0.354300
C       0.802200  -0.000000   0.362400
C       0.543100  -0.000000   0.500000
C       0.648100  -0.000000   0.500000
C       0.000000   0.699900   0.354300
C      -0.000000   0.802200   0.362400
C      -0.000000   0.543100   0.500000
C      -0.000000   0.648100   0.500000
C       0.300100  -0.000000   0.354300
C       0.197800  -0.000000   0.362400
C       0.456900  -0.000000   0.500000
C       0.351900  -0.000000   0.500000
C       0.000000   0.699900   0.645700
C      -0.000000   0.802200   0.637600
C       0.300100  -0.000000   0.645700
C       0.197800   0.000000   0.637600
C      -0.000000   0.300100   0.645700
C       0.000000   0.197800   0.637600
C       0.699900  -0.000000   0.645700
C       0.802200   0.000000   0.637600
C       0.500000   0.800100   0.854300
C       0.500000   0.697800   0.862400
C       0.500000   0.956900   0.000000
C       0.500000   0.851900   0.000000
C       0.199900   0.500000   0.854300
C       0.302200   0.500000   0.862400
C       0.043100   0.500000   0.000000
C       0.148100   0.500000   0.000000
C       0.500000   0.199900   0.854300
C       0.500000   0.302200   0.862400
C       0.500000   0.043100   0.000000
C       0.500000   0.148100   0.000000
C       0.800100   0.500000   0.854300
C       0.697800   0.500000   0.862400
C       0.956900   0.500000   0.000000
C       0.851900   0.500000   0.000000
C       0.500000   0.199900   0.145700
C       0.500000   0.302200   0.137600
C       0.800100   0.500000   0.145700
C       0.697800   0.500000   0.137600

```

|    |           |           |          |
|----|-----------|-----------|----------|
| C  | 0.500000  | 0.800100  | 0.145700 |
| C  | 0.500000  | 0.697800  | 0.137600 |
| C  | 0.199900  | 0.500000  | 0.145700 |
| C  | 0.302200  | 0.500000  | 0.137600 |
| H  | 0.000000  | 0.333000  | 0.250800 |
| H  | 0.000000  | 0.162400  | 0.261300 |
| H  | 0.667000  | -0.000000 | 0.250800 |
| H  | 0.837600  | 0.000000  | 0.261300 |
| H  | 0.000000  | 0.667000  | 0.250800 |
| H  | 0.000000  | 0.837600  | 0.261300 |
| H  | 0.333000  | -0.000000 | 0.250800 |
| H  | 0.162400  | 0.000000  | 0.261300 |
| H  | 0.000000  | 0.667000  | 0.749200 |
| H  | 0.000000  | 0.837600  | 0.738700 |
| H  | 0.333000  | 0.000000  | 0.749200 |
| H  | 0.162400  | -0.000000 | 0.738700 |
| H  | -0.000000 | 0.333000  | 0.749200 |
| H  | -0.000000 | 0.162400  | 0.738700 |
| H  | 0.667000  | 0.000000  | 0.749200 |
| H  | 0.837600  | -0.000000 | 0.738700 |
| H  | 0.500000  | 0.833000  | 0.750800 |
| H  | 0.500000  | 0.662400  | 0.761300 |
| H  | 0.167000  | 0.500000  | 0.750800 |
| H  | 0.337600  | 0.500000  | 0.761300 |
| H  | 0.500000  | 0.167000  | 0.750800 |
| H  | 0.500000  | 0.337600  | 0.761300 |
| H  | 0.833000  | 0.500000  | 0.750800 |
| H  | 0.662400  | 0.500000  | 0.761300 |
| H  | 0.500000  | 0.167000  | 0.249200 |
| H  | 0.500000  | 0.337600  | 0.238700 |
| H  | 0.833000  | 0.500000  | 0.249200 |
| H  | 0.662400  | 0.500000  | 0.238700 |
| H  | 0.500000  | 0.833000  | 0.249200 |
| H  | 0.500000  | 0.662400  | 0.238700 |
| H  | 0.167000  | 0.500000  | 0.249200 |
| H  | 0.337600  | 0.500000  | 0.238700 |
| Cu | -0.000000 | -0.000000 | 0.500000 |
| Cu | 0.500000  | 0.500000  | 0.000000 |
| Si | 0.000000  | 0.000000  | 0.000000 |
| Si | 0.500000  | 0.500000  | 0.500000 |
| N  | -0.000000 | 0.147600  | 0.500000 |
| N  | 0.852400  | -0.000000 | 0.500000 |
| N  | -0.000000 | 0.852400  | 0.500000 |
| N  | 0.147600  | -0.000000 | 0.500000 |
| N  | 0.500000  | 0.647600  | 0.000000 |
| N  | 0.352400  | 0.500000  | 0.000000 |
| N  | 0.500000  | 0.352400  | 0.000000 |
| N  | 0.647600  | 0.500000  | 0.000000 |
| F  | 0.000000  | 0.000000  | 0.790800 |
| F  | -0.000000 | -0.000000 | 0.209200 |

```

F      0.080592    0.915818    0.000000
F      0.095245    0.103300    0.000000
F      0.918680    0.088780    0.000000
F      0.912887    0.915818    0.000000
F      0.500000    0.500000    0.290800
F      0.586124    0.590007    0.500000
F      0.413626    0.417613    0.500000
F      0.500000    0.500000    0.709200
F      0.586124    0.410286    0.500000
F      0.411353    0.587977    0.500000
K_POINTS automatic
2 2 4 1 1 1

```

4. SIFSIX-2-Cu-I primitive reduced unit cell optimization input in Quantum ESPRESSO

```

&control
  calculation = 'vc-relax'
  title       = 'sifsix-2-i-cu-reduzida'
  tstress     = .TRUE.
  tprnfor     = .TRUE.
  verbosity   = 'high'
  nstep       = 600
  etot_conv_thr = 1.0D-5
  forc_conv_thr = 1.0D-5
/
&system
 ibrav      = 0
  celldm(1) = 10.4651
  nat       = 52
  ntyp      = 6
  ecutwfc   = 50.0D0
  ecutrho   = 400.0D0
  occupations = 'smearing'
  degauss   = 0.02D0
  smearing  = 'gaussian'
  nspin     = 1
  vdw_corr  = 'Grimme-D3'
/
&electrons
  electron_maxstep = 1000
  conv_thr         = 1.0D-9
  mixing_mode      = 'local-TF'
  mixing_beta      = 0.5D0
  diagonalization  = 'david'
  startingwfc     = 'atomic+random'
/
&ions
  ion_dynamics     = 'bfgs'
  ion_positions    = 'default'

```

```

    pot_extrapolation = 'atomic'
    wfc_extrapolation = 'none'
/
&cell
    cell_dynamics = 'bfgs'
    cell_dofree   = 'all'
/
CELL_PARAMETERS {alat}
    1.765267422   0.062575629  -0.023429445
    -1.238696108  1.260667847   -0.021865727
    -0.263886994 -0.664199310   1.897093901
ATOMIC_SPECIES
Cu  63.55  cu_pbe_v1.2.uspp.F.UPF
Si  28.09  si_pbe_v1.uspp.F.UPF
F   19.00  f_pbe_v1.4.uspp.F.UPF
C   12.01  c_pbe_v1.2.uspp.F.UPF
N   14.00  n_pbe_v1.2.uspp.F.UPF
H   1.01   h_pbe_v1.4.uspp.F.UPF
ATOMIC_POSITIONS (angstrom)
N      0.116720447   4.331915025   1.029803135
C      0.291056859   5.487493980   1.708728291
C     -0.525045827   5.843777837   2.774773633
C     -1.558735649   4.972353764   3.169606764
C     -1.745429395   3.786640793   2.435120563
C     -0.894998775   3.504962852   1.374983785
C     -2.380930922   5.271845948   4.279666741
Cu     1.462564316   3.740965463  -0.403321023
F      0.613619699   1.690527430  -0.320386862
Si     0.002299219   0.076685916  -0.260392163
F      1.606319946  -0.531179259  -0.322589323
F      0.075203437   0.102314398   1.453641582
F     -0.070197754   0.047056446  -1.976884657
F      2.307514906   5.790336256  -0.454702430
F     -1.600896024   0.686123176  -0.205548076
N      2.782374297   3.248319225   1.081901323
C      2.901832569   1.957682060   1.465155785
C      3.695986824   1.578702090   2.538443219
C      4.411459933   2.564328844   3.242269065
C      4.296403321   3.902847550   2.818692199
C      3.471623897   4.204754072   1.743242590
C      5.226441652   2.217017967   4.342051904
C      3.774665855  -1.467833129   5.366392211
C      2.964633357  -1.162947002   6.483913251
C      1.988195444  -2.065610347   6.947658705
C      1.193655070  -1.708017006   8.029366855
N      1.335659954  -0.520411093   8.659063960
C      2.288828668   0.342779272   8.242140434
C      3.113783474   0.061195134   7.162080247
N     -1.327526530   0.548605026   8.625712205
C     -1.417156552   1.830876491   8.207764948

```



|   |              |              |             |
|---|--------------|--------------|-------------|
| C | -2.238405605 | 2.204899960  | 7.153684377 |
| C | -3.010420156 | 1.223530840  | 6.505672489 |
| C | -2.924496567 | -0.104910796 | 6.965388879 |
| C | -2.070872119 | -0.403518446 | 8.019120162 |
| C | -3.842418665 | 1.566169849  | 5.417269953 |
| H | 2.335288749  | 1.219079046  | 0.900957097 |
| H | -0.804527212 | 2.564502886  | 8.728607684 |
| H | 3.752475543  | 0.529899013  | 2.830198043 |
| H | -2.271393932 | 3.245914334  | 6.831271517 |
| H | 3.353964489  | 5.231971372  | 1.395123138 |
| H | -1.969063101 | -1.424048279 | 8.390673528 |
| H | 0.421064585  | -2.378752239 | 8.406935683 |
| H | 1.105723727  | 6.134997139  | 1.383018871 |
| H | 3.857297019  | 0.790388106  | 6.841110472 |
| H | -2.537948120 | 3.085566226  | 2.695661524 |
| H | 2.375272641  | 1.283694466  | 8.784098774 |
| H | -1.006609835 | 2.589421395  | 0.794412328 |
| H | 4.844475279  | 4.697837753  | 3.325436785 |
| H | -3.513901023 | -0.895781256 | 6.500432852 |
| H | 1.848758363  | -3.033648675 | 6.465151717 |
| H | -0.357532485 | 6.785150976  | 3.299275568 |

K\_POINTS automatic  
2 2 4 1 1 1

## 5. Input for GCMC calculations in RASPA software

|                              |             |
|------------------------------|-------------|
| SimulationType               | MonteCarlo  |
| NumberOfCycles               | 1000000     |
| NumberOfInitializationCycles | 50000       |
| Forcefield                   | Local       |
| CutOffVDW                    | 12.0        |
| ChargeMethod                 | Ewald       |
| CutOff                       | 12.0        |
| EwaldPrecision               | 1e-6        |
| Framework                    | 0           |
| FrameworkName                | sifsix-3-cu |
| UnitCells                    | 1 1 1       |
| HeliumVoidFraction           | 0.32        |
| ExternalTemperature          | 300         |
| ExternalPressure             | \$i         |
| UseChargesFromCIFFile        | yes         |
| Component 0 MoleculeName     | methane     |
| MoleculeDefinition           | TraPPE      |
| IdealGasRosenbluthWeight     | 1.0         |
| TranslationProbability       | 0.5         |

|                         |     |
|-------------------------|-----|
| RotationProbability     | 0.5 |
| ReinsertionProbability  | 0.5 |
| SwapProbability         | 0.5 |
| CreateNumberOfMolecules | 0   |

## 6. Input for GCMC calculations for binary adsorption in RASPA software

|                              |             |
|------------------------------|-------------|
| SimulationType               | MonteCarlo  |
| NumberOfCycles               | 1000000     |
| NumberOfInitializationCycles | 50000       |
| Forcefield                   | Local       |
| CutOffFVDW                   | 12.0        |
| ChargeMethod                 | Ewald       |
| CutOff                       | 12.0        |
| EwaldPrecision               | 1e-6        |
| Framework                    | 0           |
| FrameworkName                | sifsix-3-cu |
| UnitCells                    | 1 1 1       |
| HeliumVoidFraction           | 0.32        |
| ExternalTemperature          | 300         |
| ExternalPressure             | 1.0e5       |
| UseChargesFromCIFFile        | yes         |
| Component 0 MoleculeName     | methane     |
| MoleculeDefinition           | TraPPE      |
| MolFraction                  | 0.5         |
| TranslationProbability       | 0.5         |
| IdentityChangeProbability    | 1.0         |
| NumberOfIdentityChanges      | 2           |
| IdentityChangesList          | 0 1         |
| IdealGasRosenbluthWeight     | 1.0         |
| TranslationProbability       | 0.5         |
| RotationProbability          | 0.5         |
| ReinsertionProbability       | 0.5         |
| SwapProbability              | 0.5         |
| CreateNumberOfMolecules      | 0           |
| Component 1 MoleculeName     | N2          |
| MoleculeDefinition           | TraPPE      |
| MolFraction                  | 0.5         |
| TranslationProbability       | 0.5         |
| IdentityChangeProbability    | 1.0         |
| NumberOfIdentityChanges      | 2           |
| IdentityChangesList          | 0 1         |
| IdealGasRosenbluthWeight     | 1.0         |
| TranslationProbability       | 0.5         |

|                         |     |
|-------------------------|-----|
| RotationProbability     | 0.5 |
| ReinsertionProbability  | 0.5 |
| SwapProbability         | 0.5 |
| CreateNumberOfMolecules | 0   |

### 7. Input for MC calculations in NVT ensemble in RASPA software

|                              |             |
|------------------------------|-------------|
| SimulationType               | MonteCarlo  |
| NumberOfCycles               | 1000000     |
| NumberOfInitializationCycles | 100000      |
| RestartFile                  | no          |
| Ensemble                     | NVT         |
| Forcefield                   | GenericMOFs |
| UseChargesFromCIFFile        | yes         |
| Framework                    | 0           |
| FrameworkName                | sifsix-3-cu |
| UnitCells                    | 1 1 1       |
| HeliumVoidFraction           | 0.32        |
| ExternalTemperature          | 300.0       |
| ExternalPressure             | 0.0         |
| Component 0 MoleculeName     | methane     |
| MoleculeDefinition           | TrapPE      |
| TranslationProbability       | 0.5         |
| RotationProbability          | 0.5         |
| ReinsertionProbability       | 0.5         |
| CreateNumberOfMolecules      | 1           |

### 8. Input for MD calculations in RASPA software

|                              |             |
|------------------------------|-------------|
| SimulationType               | MD          |
| NumberOfCycles               | 10000000    |
| NumberOfInitializationCycles | 200000      |
| NumberOfEquilibrationCycles  | 500000      |
| Ensemble                     | NVT         |
| ChargeMethod                 | Ewald       |
| CutOff                       | 12.0        |
| EwaldPrecision               | 1e-6        |
| TimeStep                     | 0.0005      |
| Forcefield                   | GenericMOFS |
| CutOffVDW                    | 12.0        |
| Framework                    | 0           |
| FrameworkName                | sifsix-3-cu |

```

UseChargesFromCIFFile      yes
UnitCells                   1 1 1
HeliumVoidFraction          0.32
ExternalTemperature          298
ExternalPressure             0.0

ComputeMSD yes
PrintMSDEvery 100
ComputeVACF yes
WriteVACFEvery 100

Component 0 MoleculeName      methane
           StartingBead        0
           MoleculeDefinition  TraPPE
           IdealGasRosenbluthWeight  1.0
           FugacityCoefficient   1.0
           TranslationProbability 1.0
           ReinsertionProbability 1.0
           CreateNumberOfMolecules $I

```

9. Force Field mixing rules file for methane adsorption in SIFSIX serie of MOFs employing UFF+DREIDING force fields.

```

# general rule for shifted vs truncated
truncated
# general rule tailcorrections
no
# number of defined interactions
7
# type interaction
Cu_      lennard-jones      2.5161  3.11369
N_       lennard-jones      38.9492 3.26256
C_       lennard-jones      47.8562 3.47299
H_       lennard-jones       7.6489  2.84642
Si_      lennard-jones     202.290  3.8264
F_       lennard-jones      36.4834  3.0932
CH4_sp3  lennard-jones     148.0    3.78
# general mixing rule for Lennard-Jones
Lorentz-Berthelot

```

## S10. References

- [1] O. Shekhah *et al.*, "Made-to-order metal-organic frameworks for trace carbon dioxide removal and air capture", *Nat Commun*, vol. 5, no. May, pp. 1–7, 2014, doi: 10.1038/ncomms5228.
- [2] P. Nugent *et al.*, "Porous materials with optimal adsorption thermodynamics and kinetics for co2 separation", *Nature*, vol. 495, no. 7439, pp. 80–84, 2013, doi: 10.1038/nature11893.

- [3] D. Dubbeldam, S. Calero, T. J. H. Vlugt, D. E. Ellis, and R. Q. Snurr, "RASPA 2.0.45: Molecular Software Package for Adsorption and Diffusion in (Flexible) Nanoporous Materials", 2021.
